# Supplementary material
Source: PubMed Central journal article supplement (PMC4336810)
Supplement: NIHMS631501-supplement-2.pdf [file NIHMS631501-supplement-2.pdf]

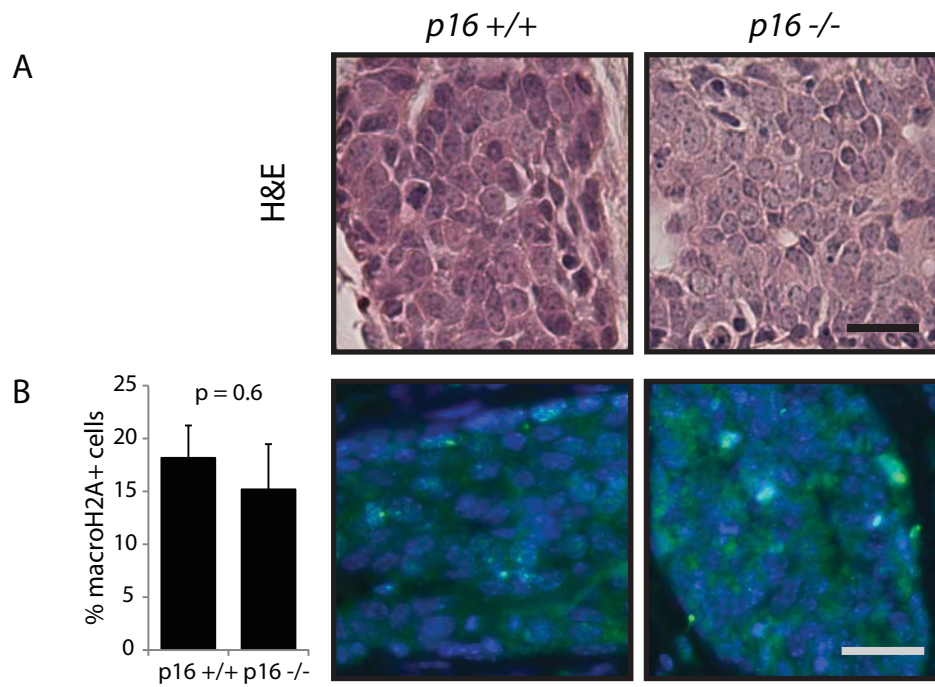

**Supplementary Figure 2:** *p16* plays a minor role in mediating senescence in the mammary gland.

Scale bar = 20 $\mu$ m. Representative images shown.

A. H&E of premalignant lesions from wildtype and *p16*-null mammary glands.

B. Quantification of macroH2A-positive cells in premalignant lesions from *p16*-null mice (n= 3, 4; lentivirus).
