# Supplementary material
Source: PubMed Central journal article supplement (PMC4336810)
Supplement: NIHMS631501-supplement-3.pdf [file NIHMS631501-supplement-3.pdf]

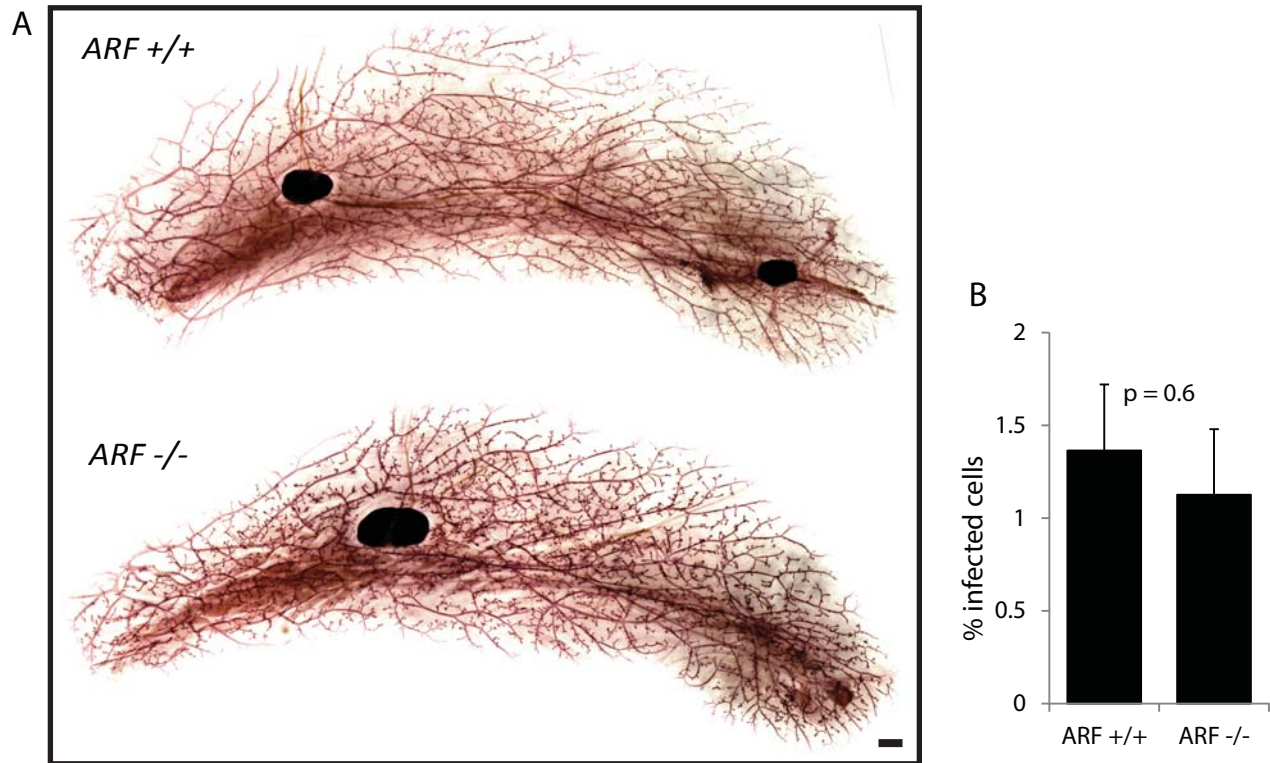

**Supplementary Figure 3:** *ARF*-loss does not affect mammary gland development or rate of infection.

- A. Uninjected wholemounts of wildtype and *ARF*-null mammary glands, stained with neutral red. (Scale = 1mm)
- B. Quantification of percent mammary epithelial cells expressing GFP four days post-intraductal injection of wildtype and *ARF*-null mice (n=9, 11; RCAS-*GFP*)
