# Supplementary material
Source: PubMed Central journal article supplement (PMC4336810)
Supplement: NIHMS631501-supplement-5.pdf [file NIHMS631501-supplement-5.pdf]

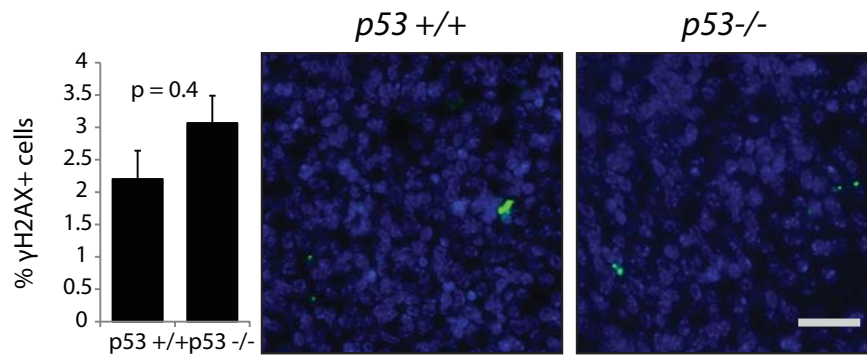

**Supplementary Figure 5:** Loss of *p53* does not diminish DDR following *ErbB2* activation. Quantification of  $\gamma$ H2AX-positive cells in premalignant lesions from *p53*-null (n=6) mice. Representative images shown.
