# Supplementary material
Source: PubMed Central journal article supplement (PMC4336810)
Supplement: NIHMS631501-supplement-6.pdf [file NIHMS631501-supplement-6.pdf]

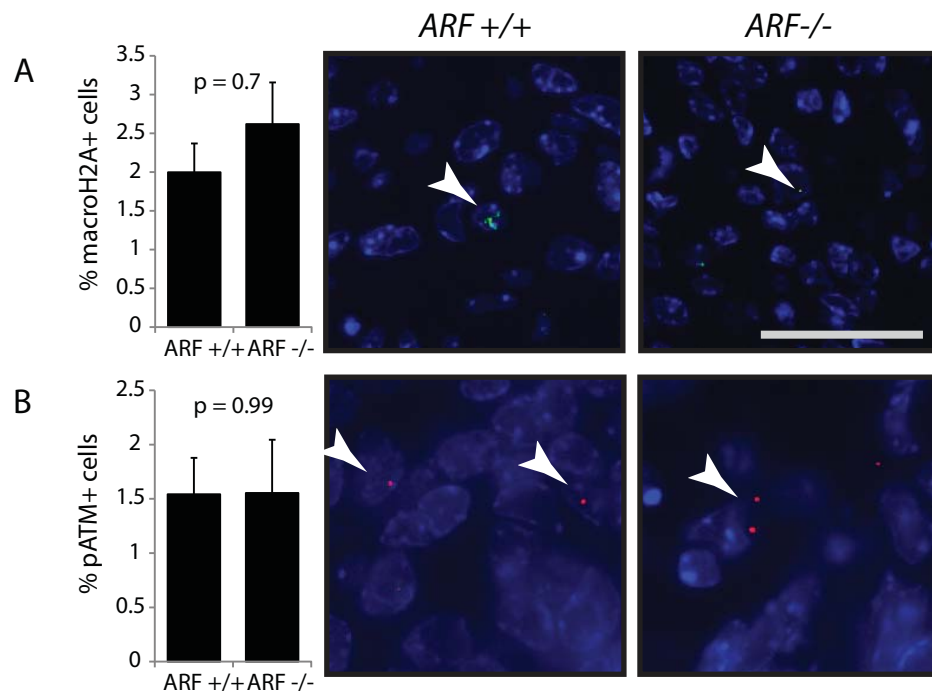

**Supplementary Figure 6:** *In contrast to premalignant lesions, ErbB2-initiated tumors in wildtype and ARF-null mammary glands exhibit comparable senescence and DDR. Scale bar = 20µm.*

- A. Quantification of macroH2A-positive cells in tumors from wildtype and *ARF*-null mice. Representative images shown.
- B. Quantification of cells bearing nuclear pATM foci in tumors from wildtype and *ARF*-null mice. Representative images shown.
